# Supplementary material for: Srsf10 and the minor spliceosome control tissue-specific and dynamic SR protein expression
Source: eLife journal article supplement (doi:10.7554/elife.56075), 2020-04-27
Supplement: supp [file elife_poa_e56075_Figure_1_figure_supplement_3.pdf › elife_poa_e56075_Figure_1_figure_supplement_3.pdf]

# ESE

|        |                                                              |    |
|--------|--------------------------------------------------------------|----|
| mouse  | aatgtaaagct-gtacagttatggagaccccaagagaaagcatgaaagaacttttagag  | 59 |
| cow    | aatgtaaagctgtacagttaatggcgaccccaagagaaagcatgaaagaaccttttagag | 60 |
| cat    | aatgtaaagctgta-cagttatggcgaccccaagagaaagcatgaaagaaccttttagag | 59 |
| human  | AATGTAAAGCTGTA-CAGTTATGGCGACCCCAAAGAGAAAGCATGAAAGAACCTTTAGAG | 59 |
| rat    | aatgtaaagctgta-cagttatggcgaccccaagagaaagcatgaaagaaccttttagag | 59 |
| pig    | aatgtaaagctgta-cagttatggcgaccccaagagaaagcatgaaagaaccttttagag | 59 |
| rhesus | aatgtaaagctgta-cagttatggcgaccccaagagaaagcatgaaagaaccttttagag | 59 |
|        | ***** * *****                                                |    |

|        |                                                              |     |
|--------|--------------------------------------------------------------|-----|
| mouse  | tagagttcaacacttaaggcaagtagacaagccaaagacctcttaaggatcaggcttgaa | 119 |
| cow    | tagagttcaacacttaaggcaagtagacaagccaaagacctcttaaggatcaggcttgaa | 120 |
| cat    | tagaattcaacacttaaggcaagtagacaagccaaagacctcttaaggatcaggcttgaa | 119 |
| human  | TAGAGTTCAACACTTAAGGCAAGTAGACAAGCCAAAGACCTCTTAAGGATCAGGCTTGAA | 119 |
| rat    | tagagttcaacacttaaggcaagtagacaagccaaagacctcttaaggatcaggcttgaa | 119 |
| pig    | tagagttcaacacttaaggcaagtagacaagccaaagacctcttaaggatcaggcttgaa | 119 |
| rhesus | tagagttcaacacttaaggcaagtagacaagccaaagacctcttaaggatcaggcttgaa | 119 |
|        | **** *****                                                   |     |
