# Supplementary material for: Srsf10 and the minor spliceosome control tissue-specific and dynamic SR protein expression
Source: eLife. 2020 Apr 27;9:e56075. doi: 10.7554/eLife.56075 (PMC7244321; doi:10.7554/eLife.56075)
Supplement: Supplementary file 1. [file elife-56075-supp1.xlsx]

## Sheet: Tabelle1
Primer name	sequence (5'-3')	used for
mSRSF10_F	ttCTCGAGATGTCCCGATACCTGCGCC	cloning
mSRSF10-fl_R	ttGGATCCgtggccactggacttggg
mSRSF10-2_R	ttGGATCCGATCTTTCTTGAAGTGTAGTAAG
mSRSF10-s_R	ttGGATCCACACCCCTCACTAATCATCC
mSRSF10_E2_F	TTAAGGATCCGTCTGAAGATTTACGTCGGG
mSRSF10_E4_R	TTAACTCGAGTCTTCCGATCCCCCTGTGC
T7_F	gactcactatagggagaccc	splice PCR
BGH_R	TAGAAGGCACAGTCGAGG
mGAPDH_qF	GTCGTGGAGTCTACTGGTGTC	qPCR
mGAPDH_qR	GAGCCCTTCCACAATGCCAAA
hGAPDH_qF	CTTCGCTCTCTGCTCCTCCTGTTCG
hGAPDH_qR	ACCAGGCGCCCAATACGACCAAAT
mSRSF10_E2_F	ATTTCTACACTCGGCGTCCA	splice PCR / qPCR
mSRSF10_E3_R	GCTTTCTCTTTGGGGTCTCC
mSRSF10_E4_R	CTGACGCCCACAAATCCATT
hSRSF10_E2_F	aagacttgcggcgtgaattt
hSRSF10_E3_R	tctttggggtcgccataact
hSRSF10_E4_R	Gccgtccacaaatccacttt
hRNPC3_qF	TTCTCGGTATTTCCTGGTTTCC	qPCR
hRNPC3_qR	GTGGGAAGAAGTCTCAGTCAAA
mRNPC3_qF	GCG CGT CCT GTC AGA TAA GG
mRNPC3_qR	GGA GTG AAC TCG ATC TTG CTC T
mSRSF1_qF	CCCTTCGCCTTCGTTGAGTTCG
mSRSF1_qR	GAAACTCTACCCGCAGCCGg
mSRSF2_qF	GATGCCTTGTCGTGCAGAAA
mSRSF2_qR	TGTGCTCACTGTATGCTCCA
mSRSF3_qF	cagaagtgtgtgggttgctc
mSRSF3_qR	agttccactcttacacggca
mSRSF5_qF	TTCCTCTAGGTCCCGTAGCC
mSRSF5_qR	CGAAGAACCACGTTTCTGGC
mSRSF7_qF	CCGTCGTCCCTTTGATCCTA
mSRSF7_qR	CGTGACCTGCTTCTTCTTCG
hSRSF1_qF	CACTGGTGTCGTGGAGTTTG
hSRSF1_qR	AACCCGGATGTAGGCAGTTT
hSRSF2_qF	TCCAAGTCCAAGTCCTCGTC
hSRSF2_qR	GCGACCTGGATTTGGATTCC
hSRSF3_qF	AGACGGAATTGGAACGGGCTT
hSRSF3_qR	AAAGCAAAGCCGGGTGGGTT
hSRSF4_qF	TGCGTCAGGCAGGAGAAGTG
hSRSF4_qR	CGTCGTCTGGAACCTGGCTT
hSRSF5_qF	TGGCTGTCGGGTATTCATCGG
hSRSF5_qR	ACACAGCATCATCTGCATCCCT
hSRSF6_qF	CGGATGCCCACAAGGAACGA
hSRSF6_qR	TCTGTGCCATCCAGTTTGTCCA
hSRSF7_qF	CGAGGACTGGATGGAAAGGT
hSRSF7_qR	TCGCCACACTCATAGCATCT
hSRSF8_qF	CTCGCTACGGCGGATCTCAC
hSRSF8_qR	ACTTGGATCGTCGCGCAGAG
hSRSF9_qF	CACAATGCAGTGCGGCTGAG
hSRSF9_qR	GCACGTCGGTCGGAAGGTT
hSRSF11_qF	TCGACGAACTGCGCCTCTTC
hSRSF11_qR	TGCTGTGCCACAACTGCTGA
hSRSF12_qF	GGGAAGAAATAGGAGGCGGTCAG
hSRSF12_qR	GCTGAGGTAGACCGCCTTGG
BCLAF1_F	TGGATCTGGCTCTGTTGGAAAT	splice PCR
BCLAF1_R	AGCAAGTAGCCTGTCTTTAGTC
PTBP2_F	GGGCATGCCTGGAGTCTCAG
PTBP2_R	CTTCACGCGCTGCACATCTC
ZFP207_F	TTCCTCCAATGACTCAAG
ZFP207_R	CTGTAGACTGTGTATAAGC
siRNA name	sequence (5'-3')
siCtrl	UUUGUAAUCGUCGAUACCCdTdT	knockdown
siSrsf10	GCGUGAAUUUGGUUAUdTdT
siRnpc3	GAAAGAAGGUCGUAUGAAAdTdT
single guide RNAs
SRSF10_E3_3fw	caccgctactttactcggtaagcca	generation ΔE3 cell line
SRSF10_E3_3rv	aaactggcttaccgagtaaagtagc
SRSF10_E3_5fw	caccgtgagtttcagaagcatgaat
SRSF10_E3_5rv	aaacattcatgcttctgaaactcac
