# Supplementary figures and images for: Srsf10 and the minor spliceosome control tissue-specific and dynamic SR protein expression
Source: eLife journal article supplement (doi:10.7554/elife.56075), 2020-04-27

**A**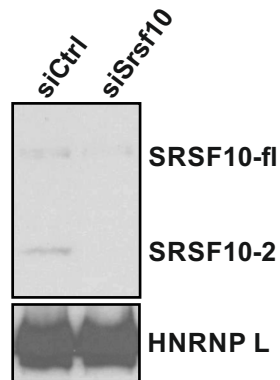**B**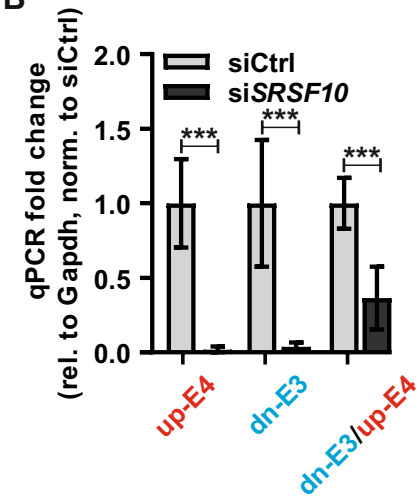**C**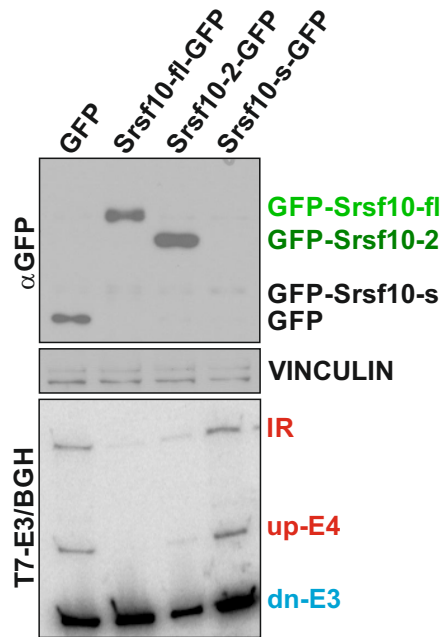**D**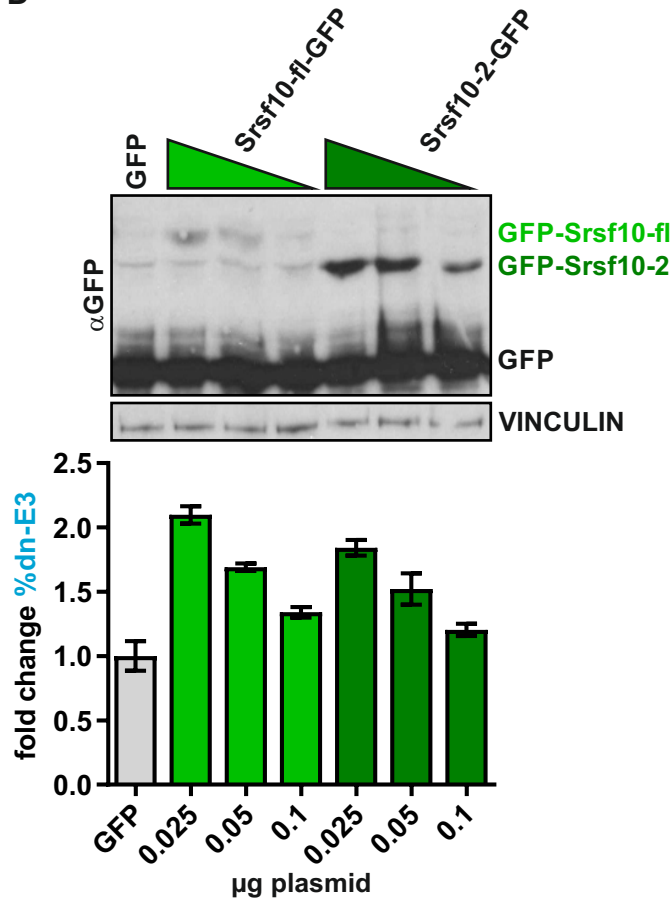

Supplement: supp [file elife_poa_e56075_Figure_1_figure_supplement_1.pdf › elife_poa_e56075_Figure_1_figure_supplement_1.pdf]

**A**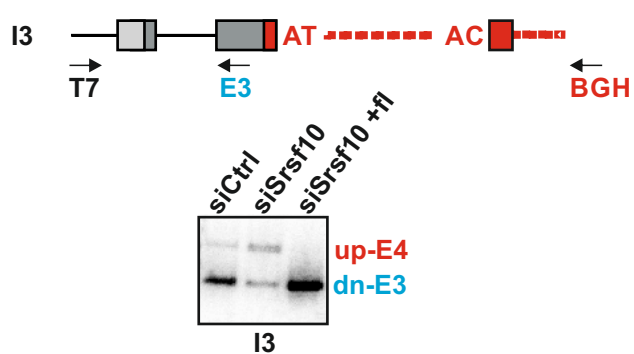**B**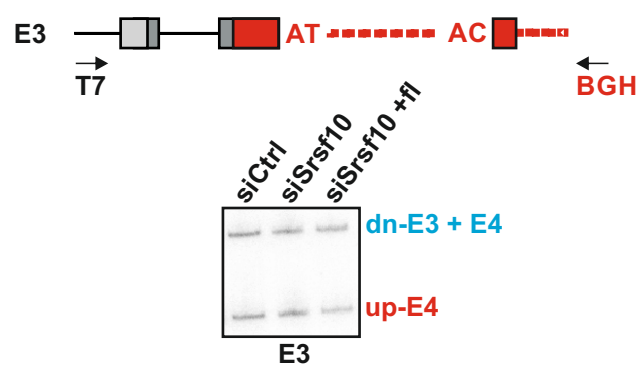**C**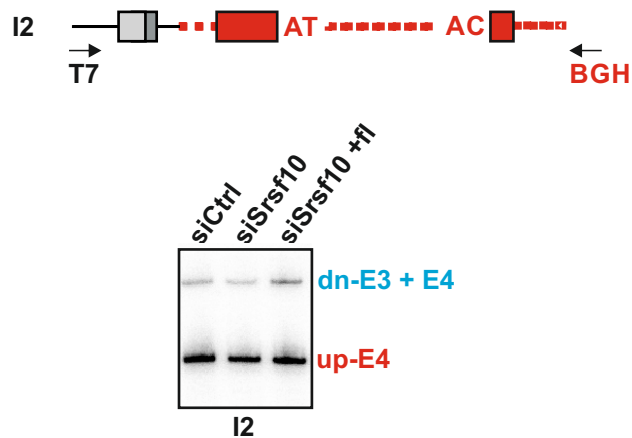**D**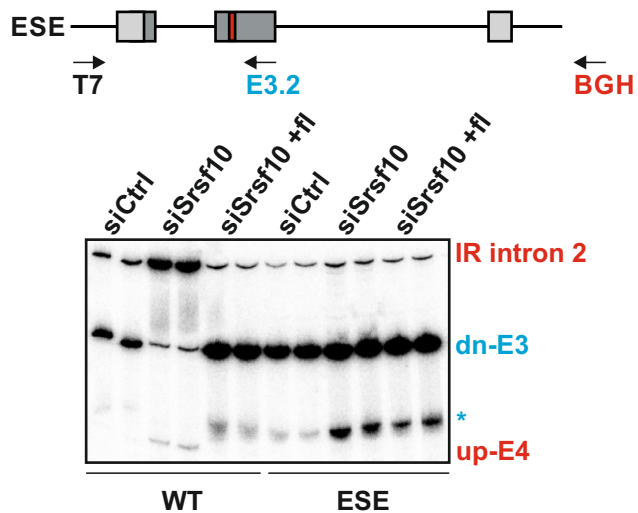

Supplement: supp [file elife_poa_e56075_Figure_1_figure_supplement_2.pdf › elife_poa_e56075_Figure_1_figure_supplement_2.pdf]

major

minor

siCtrl  
siSRSF10  
siSRSF10 +fl

siCtrl  
siSRSF10  
siSRSF10 +fl

dn-E4

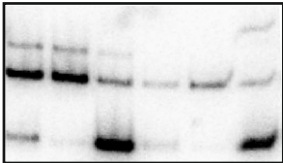

up-E4

up-E3

Supplement: supp [file elife_poa_e56075_Figure_2_figure_supplement_1.pdf › elife_poa_e56075_Figure_2_figure_supplement_1.pdf]

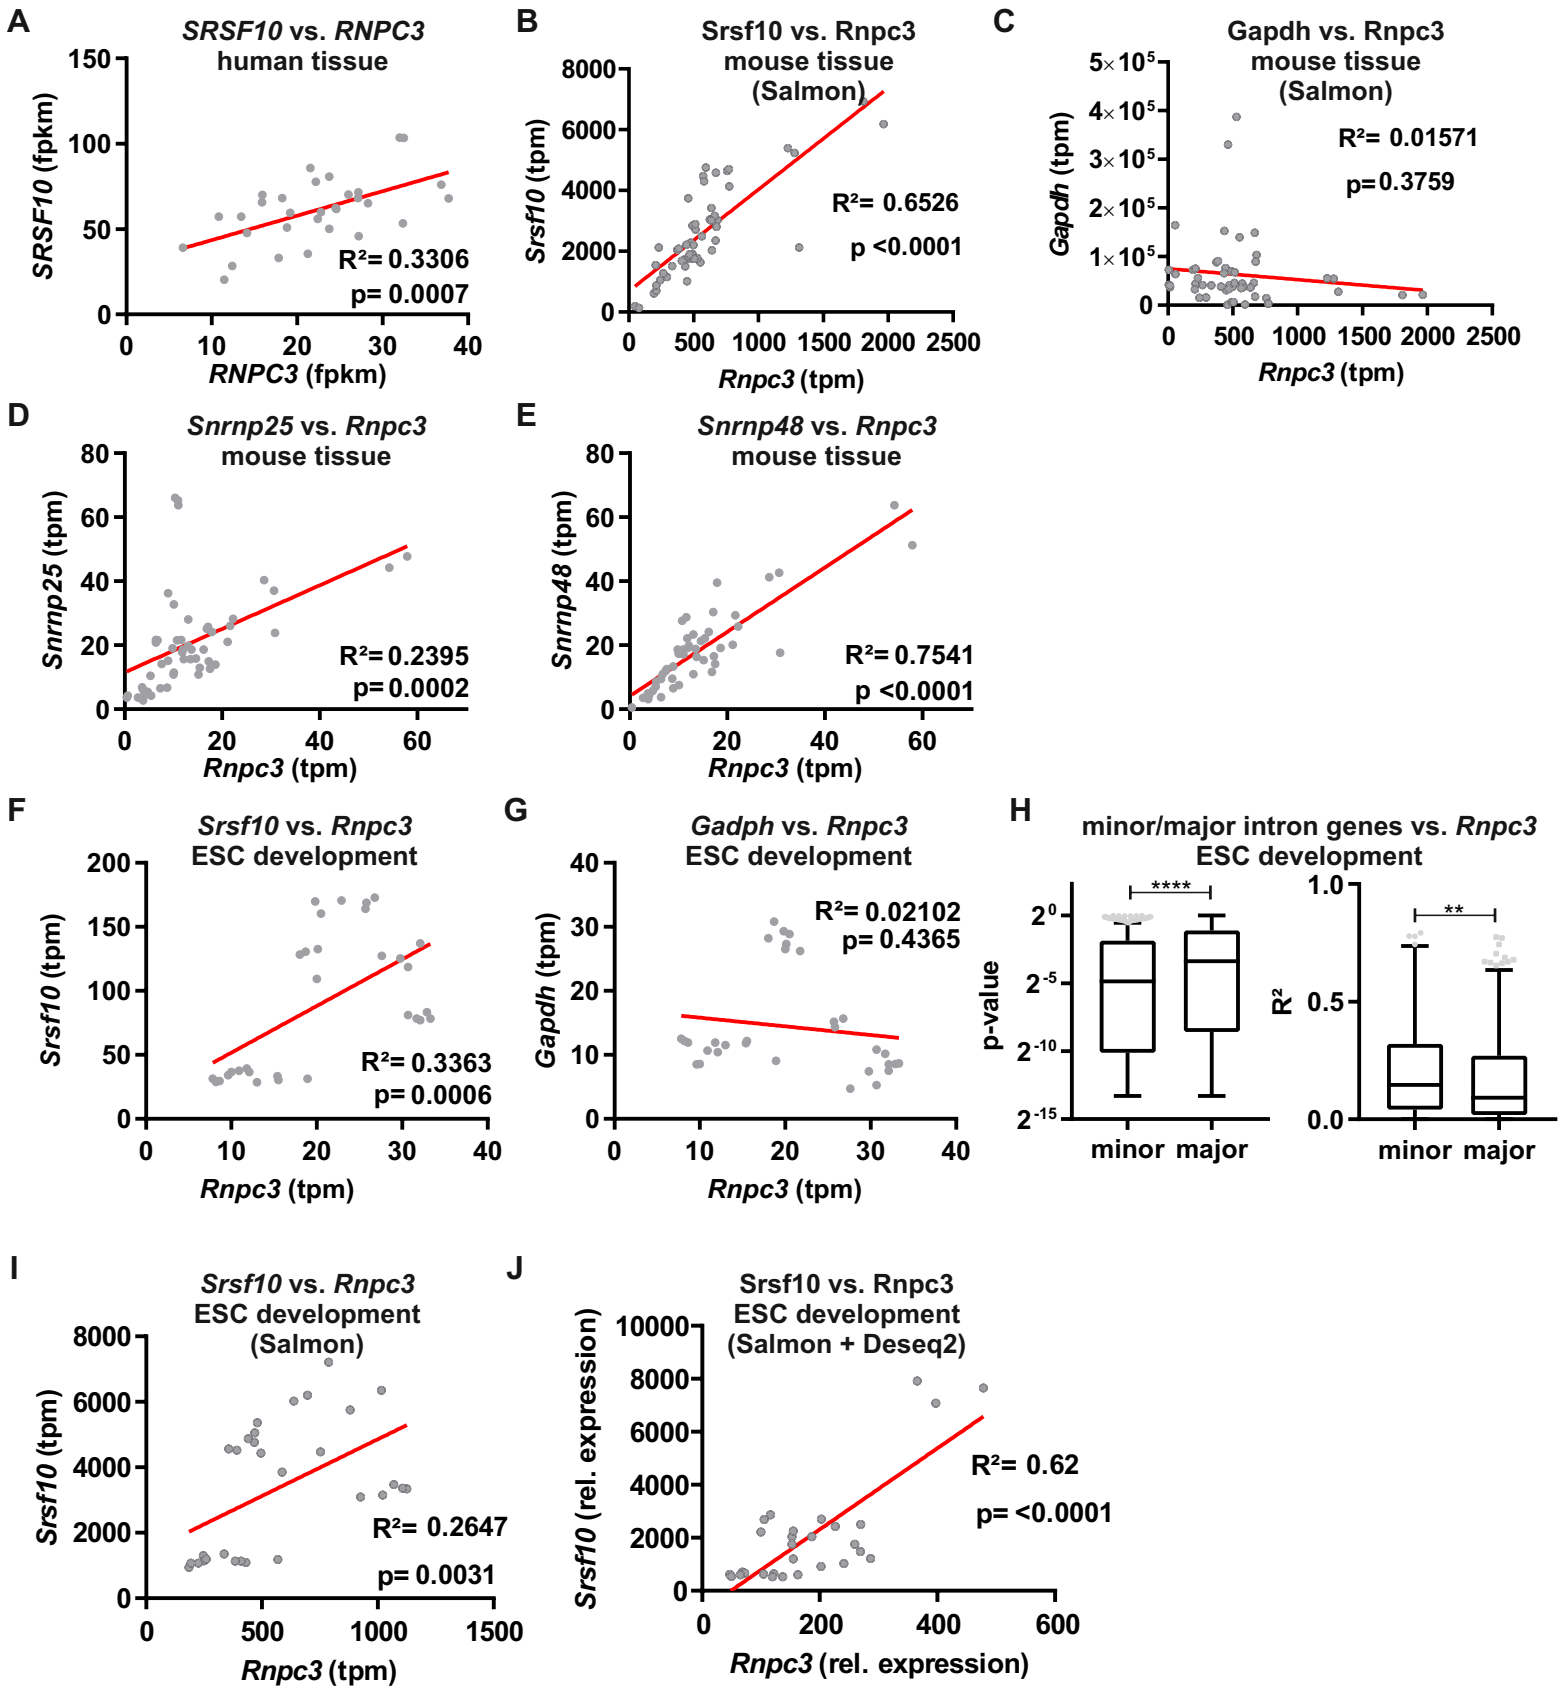

Supplement: supp [file elife_poa_e56075_Figure_3_figure_supplement_1.pdf › elife_poa_e56075_Figure_3_figure_supplement_1.pdf]

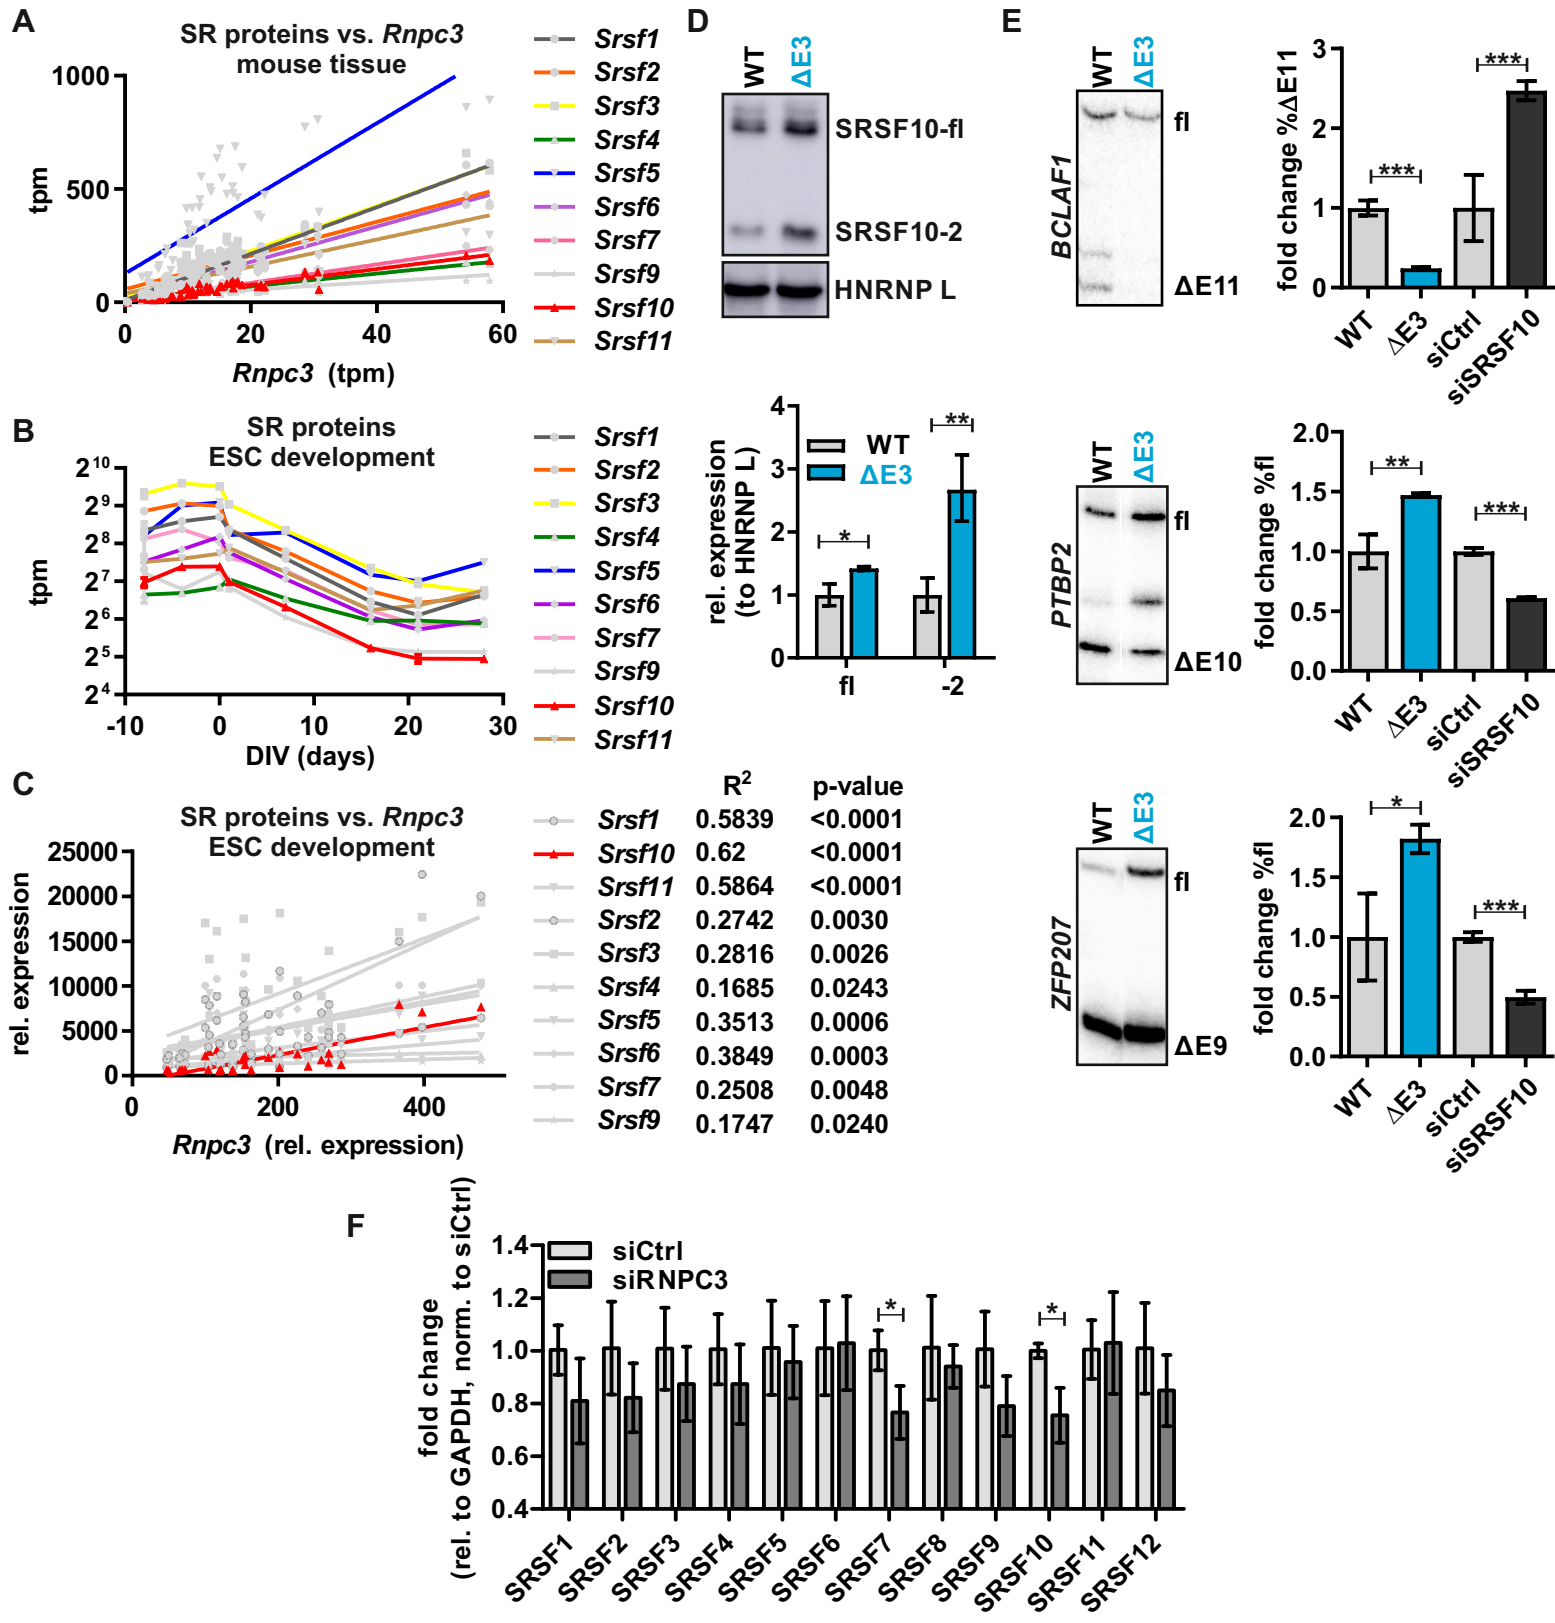

Supplement: supp [file elife_poa_e56075_Figure_4_figure_supplement_1.pdf › elife_poa_e56075_Figure_4_figure_supplement_1.pdf]

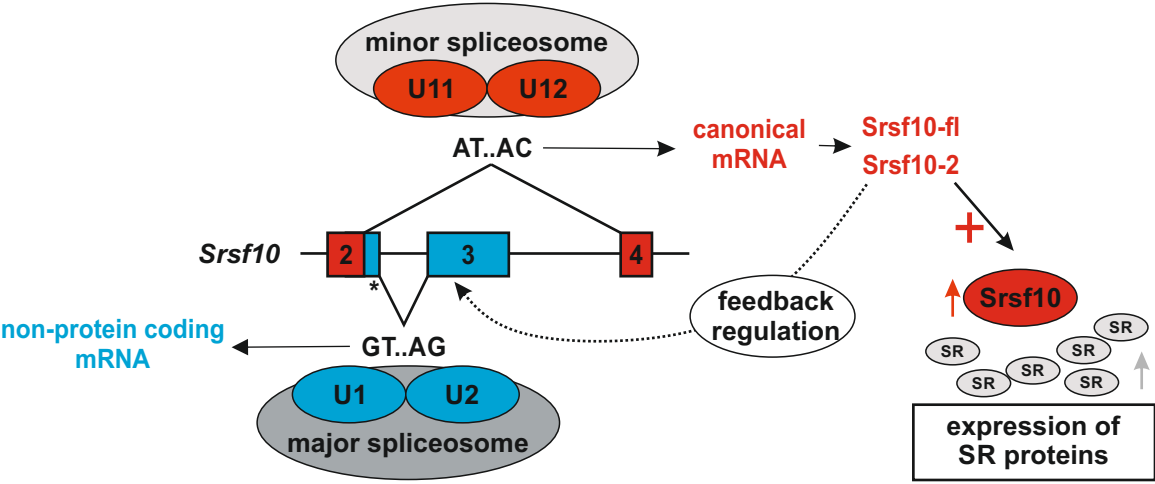

Supplement: supp [file elife_poa_e56075_Figure_4_figure_supplement_2.pdf › elife_poa_e56075_Figure_4_figure_supplement_2.pdf]
